CORRECTION

# Correction: Structural Based Analyses of the JC Virus T-Antigen F258L Mutant Provides Evidence for DNA Dependent Conformational Changes in the C-Termini of Polyomavirus Origin Binding Domains

Gretchen Meinke, Paul J. Phelan, Jong Shin, David Gagnon, Jacques Archambault, Andrew Bohm, Peter A. Bullock

[Fig 11](#) is incorrect. The authors have provided the correct version of [Fig 11](#) here.

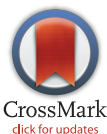

## OPEN ACCESS

**Citation:** Meinke G, Phelan PJ, Shin J, Gagnon D, Archambault J, Bohm A, et al. (2016) Correction: Structural Based Analyses of the JC Virus T-Antigen F258L Mutant Provides Evidence for DNA Dependent Conformational Changes in the C-Termini of Polyomavirus Origin Binding Domains. PLoS Pathog 12(2): e1005482. doi:10.1371/journal.ppat.1005482

**Published:** February 29, 2016

**Copyright:** © 2016 Meinke et al. This is an open access article distributed under the terms of the [Creative Commons Attribution License](#), which permits unrestricted use, distribution, and reproduction in any medium, provided the original author and source are credited.

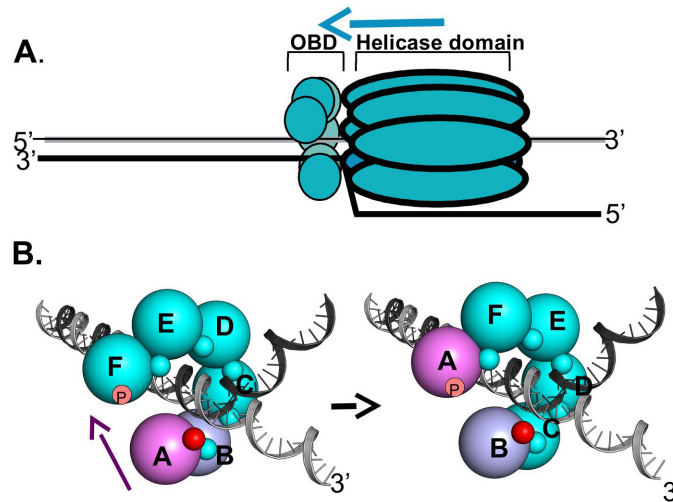

**Fig 11. A model depicting how DNA dependent conformational changes in the C-terminus of the T-ag OBDs could regulate interface formation within T-ag hexamers.** **A.** A rendering of a single T-ag hexamer assembled at a replication fork. The OBDs (small spheres) are depicted as being proximal to the forks and assembled into a hexameric spiral (reviewed in [26]). The overall 3' to 5' movement of the T-ag helicase is suggested by the blue arrow. Not shown are the flexible linkers connecting the OBDs to the helicase domains. **B.** Depiction of the proposed DNA dependent dynamics within the OBD spiral at a replication fork. The structure based model of a hexameric OBD spiral at a replication fork is adapted from previous models ([37]; reviewed in [26]). The OBDs are depicted as spheres of ~ 32 Å diameter, labeled A-F, that are situated at the center of mass of each OBD. The multifunctional A1/B2 regions are depicted as very small spheres. (Left side): In the terminal A subunit of the spiral (pink), the A1/B2 region (small red sphere), is free and thus available for interactions with DNA. The other A1/B2 regions are involved in OBD:OBD interface formation (small teal colored spheres). When the A1/B2 region in subunit A interacts with the ds/ss fork, the DNA dependent conformational changes in the F257/258 containing C-termini are induced. As a result, the interface between OBD subunits A and B (purple and light blue; respectively) is disrupted. The freed OBD subunit is then free to participate in a "hand-over-hand" movement (purple arrow) and bind its A1/B2 motif to the pocket (symbolized as a "p") in subunit F. (Right side): The A1/B2 region (small red sphere) on subunit B is now accessible. Therefore, the cycle continues when the free A1/B2 regions on subunit B engage the ds/ss DNA at the fork.

doi:10.1371/journal.ppat.1005482.g001

## Reference

1. Meinke G, Phelan PJ, Shin J, Gagnon D, Archambault J, Bohm A, et al. (2016) Structural Based Analyses of the JC Virus T-Antigen F258L Mutant Provides Evidence for DNA Dependent Conformational Changes in the C-Termini of Polyomavirus Origin Binding Domains. *PLoS Pathog* 12(1): e1005362. doi: [10.1371/journal.ppat.1005362](https://doi.org/10.1371/journal.ppat.1005362) PMID: [26735515](https://pubmed.ncbi.nlm.nih.gov/26735515/)
